# Supplementary material for: Salivary IgA subtypes as novel disease biomarkers in systemic lupus erythematosus
Source: PubMed Central journal article supplement (PMC9992540; doi:10.3389/fimmu.2023.1080154), 2023-02-22
Supplement: DataSheet_1.pdf [file DataSheet_1.pdf]

## *Supplementary Material*

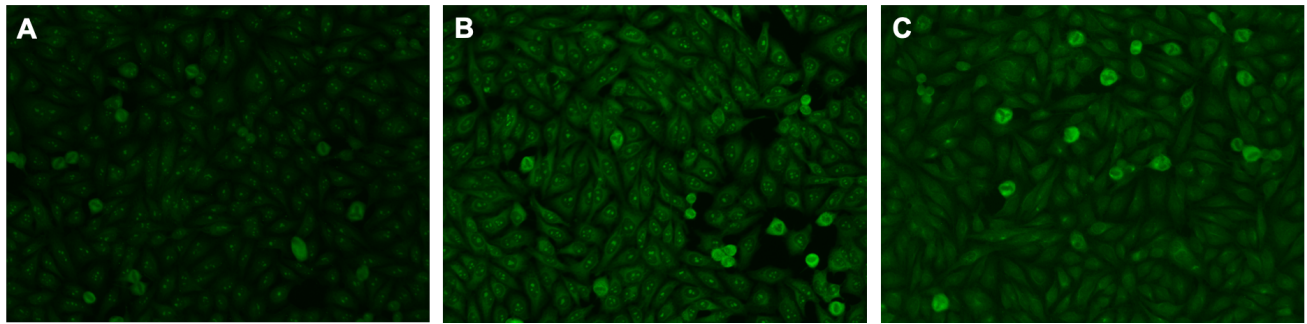

**Supplementary Figure 1. Examples of IgA ANAs patterns contained in the saliva of SLE patients.** Hep-2 indirect immunofluorescences employing an anti IgA as detection antibody. A. Nuclear-nucleolar, B. Nuclear-nucleolar and cytoplasmic. C. Cytoplasmic and polar/Golgi-like. 40x in all fields.

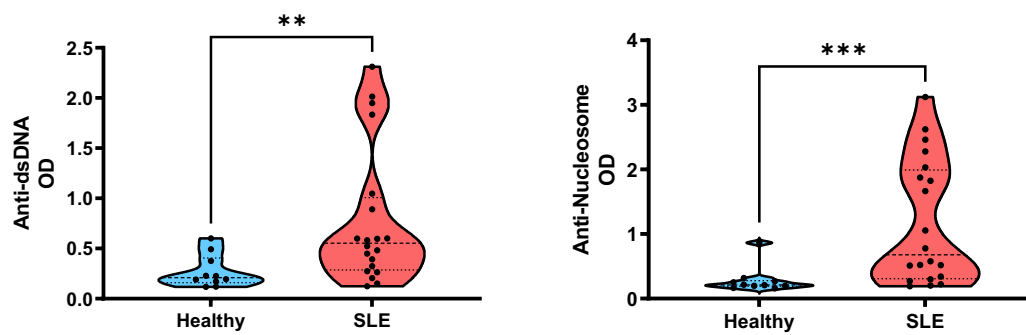

**Supplementary Figure 2. Levels of serum IgA anti-dsDNA and serum IgA anti-nucleosome in patients with SLE.** A. Serum IgA anti-dsDNA in healthy individuals and SLE patients. B. Serum IgA anti-nucleosome in healthy individuals and SLE patients. Data were assessed from n= 20 SLE patients and n=10 healthy individuals by Mann-Whitney U tests. \*\*p<0.01, \*\*\*p<0.001.

**Supplementary Table 1. Sensitivity/specificity values for salivary IgA subtypes and commonly used diagnostic markers in SLE.**

| <b>Marker</b>         | <b>AUC</b>  | <b>Sensitivity at 95% specificity</b> | <b>Reference</b> |
|-----------------------|-------------|---------------------------------------|------------------|
| Salivary IgA1         | 0.855       | 59.46%                                | This work        |
| Salivary IgA2         | 0.761       | 26.32%                                | This work        |
| Serum anti-dsDNA      | 0.800       | 41.20%                                | 31               |
| Serum anti-nucleosome | 0.704       | 26.70%                                | 31               |
| C3/C4                 | 0.730/0.720 | 44.00%                                | 32               |
